# Supplementary material
Source: Springer Nature journal article supplement (https://www.springermedizin.de/resource/supplementary/12990_2009_305_MOESM5_ESM.pdf/9612992)

**A**

Oxidative burst in SW982 synoviocytes, activated by exogenous  $H_2O_2$  can be prevented by ROS scavenger PBN

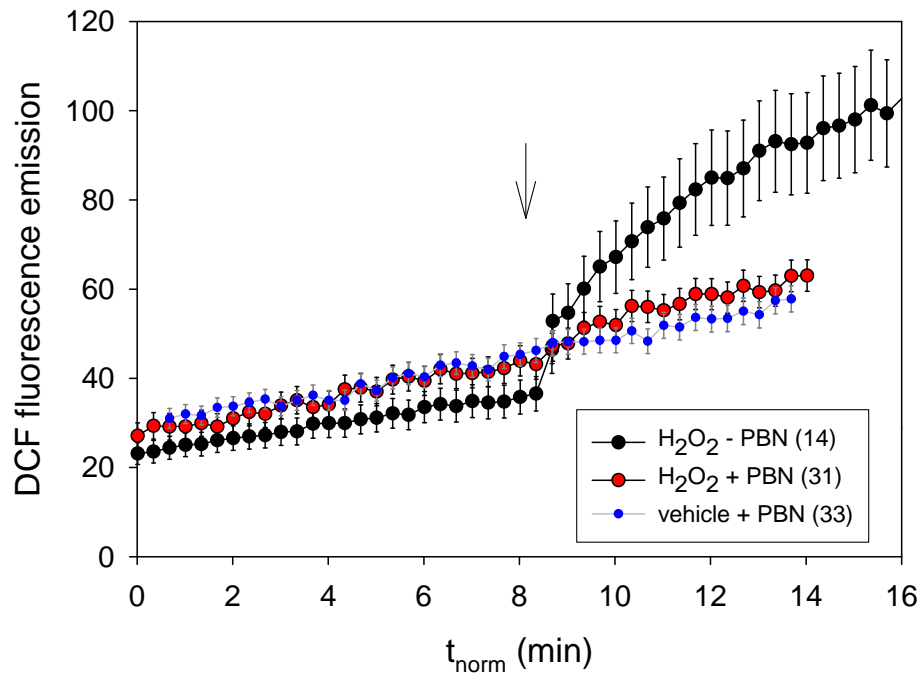**B**

Quantification of TRPV1 Expression after  $100\mu M$  tBOOH Exposure with and without SB-366791

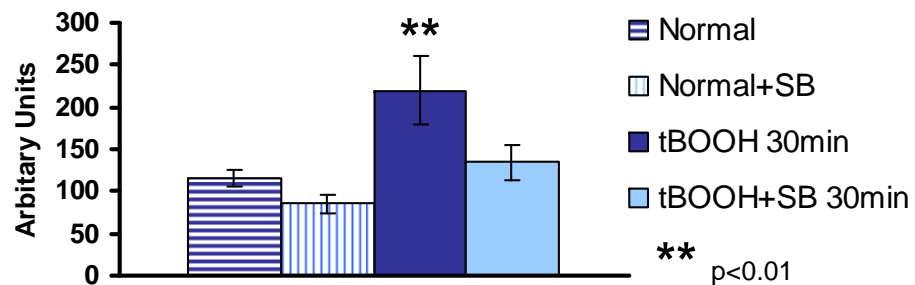**C**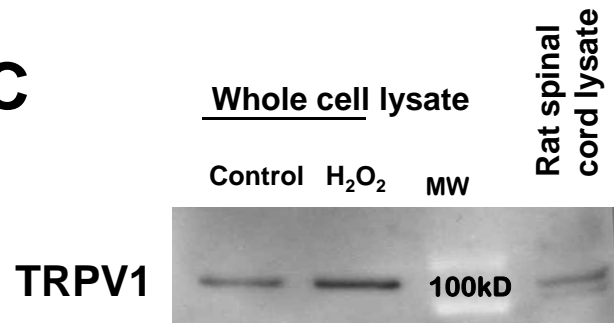

Supplement: MOESM5 [file 9612992]
